## The fission yeast methylphosphate capping enzyme Bmc1/Bin3 promotes 2'-O-methylation of U6 and pre-mRNA splicing

Jennifer Porat<sup>1</sup>, Viktor A. Slat<sup>2</sup>, Stephen D. Rader<sup>2</sup>, Mark A. Bayfield<sup>1\*</sup>

1. Department of Biology, York University, Toronto, Canada

2. Department of Chemistry and Biochemistry, University of Northern British Columbia, Prince George, Canada

\*Mark A. Bayfield

**Email:** [bayfield@yorku.ca](mailto:bayfield@yorku.ca)

**Author Contributions:** J.P. and M.A.B. conceived of the project and designed research, J.P. performed research, J.P. and V.A.S. analyzed the data, J.P. wrote the manuscript, J.P., V.A.S., S.D.R., and M.A.B. edited the manuscript, and M.A.B. and S.D.R. supervised the research and acquired funding.

**Competing Interest Statement:** The authors declare no competing interests

**Keywords:** RNA, splicing, RNA methylation, spliceosome, small nuclear RNA

### This PDF file includes:

Main Text  
Figures 1 to 6

## Abstract

Efficient splicing requires the tight coordination of dynamic spliceosomal RNAs and proteins. U6 is the only spliceosomal RNA transcribed by RNA Polymerase III and undergoes an extensive maturation process. In both humans and fission yeast, this includes addition of a 5'  $\gamma$ -monomethyl phosphate cap by members of the Bin3/MePCE family. Previously, we have shown that the Bin3/MePCE homolog Bmc1 is recruited to the *S. pombe* telomerase holoenzyme by the LARP7 family protein Pof8, where it acts in a catalytic-independent manner to protect the telomerase RNA and facilitate holoenzyme assembly. Here, we show that Bmc1 and Pof8 also interact in a U6-containing snRNP. We demonstrate that Bmc1 and Pof8 promote 2'-O-methylation of the U6 internal stem loop and identify and characterize a non-canonical snoRNA that guides this methylation. Fission yeast strains deleted of Bmc1 show altered U4/U6 di-snRNP assembly patterns and impaired splicing at elevated temperatures. These results are thus consistent with a novel role for Bmc1/MePCE family members in stimulating U6 post-transcriptional modifications and promoting U6 snRNP assembly and splicing fidelity.

## Significance Statement

The spliceosomal RNA U6 undergoes numerous processing and post-transcriptional modification steps before incorporation into the spliceosome. Here, we identify a new U6-containing complex in fission yeast that shares components with the telomerase holoenzyme, including the 5' phospho-methyltransferase Bmc1. This complex promotes 2'-O-methylation of U6 and influences formation of the U4/U6 di-snRNP, and cells lacking Bmc1 show splicing defects at inefficiently spliced introns at elevated temperatures. Our results reveal a novel complex of proteins and RNA that cooperate to ensure splicing fidelity.

## Main Text

### Introduction

Pre-mRNA splicing, comprised of intron excision and subsequent exon ligation, relies on dynamic RNA-RNA and RNA-protein interactions in the spliceosome (reviewed in (1)). The spliceosome contains upwards of 100 proteins (2) and 5 uridylate-rich small nuclear RNAs (snRNAs): U1, U2, U4, U5, and U6. The U6 snRNA, which forms part of the catalytic core of the spliceosome (3), undergoes several conformational changes during pre-spliceosome assembly and splicing catalysis, which enables its interaction with other spliceosomal RNAs and the switch between a catalytically active and inactive state (4). As such, U6 biogenesis and maturation is complex and tightly regulated to ensure correct functioning in the spliceosome (reviewed in (5)).

In addition to being the most highly conserved of the snRNAs, U6 is also the only snRNA transcribed by RNA Polymerase III (RNAP III) (6). Transcription of U6 by RNAP III is associated with the addition of a 5'  $\gamma$ -monomethyl phosphate cap catalyzed by enzymes of the Bin3/MePCE (methylphosphate capping enzyme) family (7–9) and a 3' uridylate tail. U6 contains a 5' stem loop critical for 5' capping (10), as well as an internal stem loop (ISL) that forms during splicing catalysis. The ISL is mutually exclusive with U4/U6 base pairing that occurs in pre-spliceosome snRNPs (11). U6 also contains 2'-O-methylated, pseudouridylated, and m6A-modified nucleotides, with pseudouridines largely present towards the 5' end and 2'-O-methylations tending to cluster in the ISL (12, 13). Moreover, U6 maturation in the fission yeast *Schizosaccharomyces pombe* involves the splicing of an mRNA-type intron, thought to arise from reverse splicing, as the intron is located near the catalytic nucleotides of U6 (14–18). Most information about the timing of U6 processing events has come from elegant studies in budding yeast (reviewed in (5)). However, since budding yeast U6 lacks 2'-O-methylations and a Bmc1 homolog (19, 20), several questions remain as to the timing and importance of post-transcriptional modifications with respect to other U6 processing steps in organisms like fission yeast and humans.

In addition to 5'  $\gamma$ -monomethyl phosphate capping enzymes, several other proteins have been linked to U6 processing. These include the La protein, which associates with nascent U6 transcripts through the 3' uridylate tail (21), and the Lsm2-8 complex, which binds end-matured U6 and remains stably associated through spliceosome assembly (22–24). Recent work revealed that mammalian LARP7, a La-Related Protein (LARP) previously linked to MePCE in the context of the 7SK snRNP (25), is also involved in post-transcriptional processing of U6. LARP7 promotes 2'-O-methylation of U6 by the methyltransferase fibrillarin, which in turn contributes to splicing fidelity at elevated temperatures in humans and in male germ cells in mice (26, 27). Conversely, ciliate and fission yeast LARP7 homologs have been well studied for their roles in telomerase biogenesis (28–33). We and others have reported that the *S. pombe* LARP7 protein Pof8 associates with the Bin3/MePCE homolog Bmc1 in the telomerase holoenzyme, that this interaction is important for optimal telomerase activity, and that the link between these proteins is evolutionarily conserved across diverse fungal species (19, 20, 34). Thus, while much has been learned about MePCE/Bmc1 function in the 7SK snRNP and telomerase, its precise role in U6 biogenesis and function remains unknown.

In this work, we set out to examine the role of Bmc1 in U6 biogenesis and spliceosome function. We have identified a new RNP containing the U6 snRNA and the telomerase components Bmc1, Pof8, and Thc1, and show that this complex is required for wild type levels of 2'-O-methylation in the U6 ISL. Further, we demonstrate that Bmc1 indirectly influences spliceosome assembly and promotes the splicing of inefficiently spliced introns. Finally, we show that while Bmc1's 5' capping catalytic activity is not required for its function in promoting 2'-O-methylation of U6, an intact Pof8-Lsm2-8 interaction is. Together, these data point towards an intricate network of post-transcriptional processing events that are critical for U6 maturation, and provide the first direct evidence for a function of the Bin3/MePCE family in promoting the efficiency of pre-mRNA splicing.

## Results

### **Bmc1 forms a U6-containing complex with the telomerase proteins Pof8 and Thc1**

Our previous work characterizing Bmc1 as a component of the telomerase holoenzyme also revealed interactions between Bmc1 and various other noncoding RNAs, including the U6 snRNA (Figure S1A) (20). We therefore tested whether Bmc1 has a role in the biogenesis, stability, or function of these transcripts, and if this function is linked to the Bmc1-interacting telomerase components Pof8 and Thc1. Having already demonstrated that Pof8 is required to recruit Bmc1 to the telomerase RNA TER1 (20), we determined the protein binding requirements for U6. In contrast to what has been reported for TER1, for which reduced binding to Pof8 persists in the

absence of Bmc1 (20, 34), we found that all three proteins are necessary for an interaction with U6 (Figure 1A, S1B). Our results indicating an interaction between Pof8 and U6 are also consistent with previous work identifying mammalian LARP7 as a U6-interacting protein (26, 27), suggesting that LARP7 family members have conserved functions related to U6, in addition to the established evolutionary conservation of LARP7 in telomerase (29–31).

As an additional means to confirm U6 snRNP formation, we fractionated native cell extracts on glycerol gradients and compared protein and RNA sedimentation in wild type and knockout yeast strains (Figure 1B, S1C). A substantial fraction of Bmc1 and Pof8 co-migrated with U6, and importantly, co-migration of Pof8 with U6 was impaired upon deletion of Bmc1 (Figure 1B), as well as co-migration of Bmc1 with U6 upon deletion of Pof8 (Figure S1C). We propose that Bmc1, Pof8, and Thc1 associate with U6 simultaneously, with all three proteins required to be present to initiate formation of the Bmc1-containing U6 snRNP. Together, these data point towards the existence of a new U6-containing complex that also shares components with the telomerase holoenzyme, providing a new and surprising link between two seemingly disparate fission yeast noncoding RNA pathways.

### **Bmc1, Pof8, and Thc1 promote 2'-O-methylation of U6**

To gain further insight into the role of the Bmc1-containing U6 snRNP, we examined our Bmc1 RIP-Seq dataset (20), which revealed an interaction between Bmc1 and snoZ30, which guides 2'-O-methylation of U6 at position 41 (35) (Figure S1A, S2A, B). Further supporting the idea that U6 complex formation is contingent on the presence of all three proteins, we observed a loss of snoZ30 binding to Bmc1 upon knockout of any member of the complex (Figure S2A). The observed interaction between Bmc1 and snoZ30, coupled with the well-characterized function of mammalian LARP7 in facilitating snoRNA-guided 2'-O-methylation of U6 by the methyltransferase fibrillarin (26, 27) provided initial clues as to the function of this new U6-containing snRNP. To determine if Bmc1, Pof8, and Thc1 influence 2'-O-methylation, we mapped U6 2'-O-methylation sites by performing primer extensions at low dNTP concentrations (35). Although snoZ30 is the sole annotated U6-modifying snoRNA in fission yeast (35), several other 2'-O-methylated sites have been identified in U6, including A64 (13). Deletion of Bmc1, Pof8, and Thc1 resulted in no observable changes in 2'-O-methylation at the snoZ30-modified A41, but we did detect a reproducible decrease in modification at several other sites, most notably A64 (Figure 1C, D, Figure S3).

Initial attempts at identification of the U6 A64-methylating snoRNA using box C/D snoRNA consensus sequences and base pairing rules (36) yielded no other obvious snoRNA candidates, so we instead turned to our Bmc1 RIP-Seq dataset in the hope we might identify novel snoRNAs (Figure S1A). The uncharacterized fission yeast noncoding RNA, SPNCRNA.530 (henceforth referred to as sno530), contains a D box, a putative C box one nucleotide different from the C box consensus motif, and a region with 12 nucleotides of complementarity with U6, with a single non-Watson Crick base pair (Figure S2C). It is also noteworthy that the predicted secondary structure of sno530 does not position the C and D boxes flanking a hairpin, as is common for canonical box C/D snoRNAs (Figure S2C). We validated the interaction between Bmc1 and sno530 by RNP immunoprecipitation/qPCR and showed that much like snoZ30 and U6, this interaction is dependent on the presence of the assembled Bmc1-Pof8-Thc1 complex (Figure 1A). Deletion of snoZ30 and sno530 resulted in a loss of 2'-O-methylation at A41 and A64, respectively, suggesting that sno530 is indeed the A64 U6-modifying snoRNA (Figure 1C, D, Figure S3). We obtained similar results using a complementary method that exploits the tendency for 2'-O-methylations to block RNase H cleavage following the annealing of a chimeric DNA-2'RNA oligo targeting the suspected 2'-O-methylated site (37, 38) (Figure S4A). This also served to provide evidence for 2'-O-methylation at C57, suggesting that it, too, is another site in U6 whose modification is similarly promoted by Bmc1 and Pof8 (Figure S4B). While our knockout studies unambiguously identify sno530 as the A64 U6-modifying snoRNA, the unusual sequence and architecture of sno530 relative to snoZ30 is more reminiscent of the divergent box C'/D' motifs

that stimulate rRNA 2'-O-methylation by providing additional regions of complementarity surrounding the methylated site (39, 40).

### **Bmc1, Pof8, and Thc1 are involved in U4/U6 di-snRNP formation**

We then wondered how disruption of the Bmc1-containing U6 snRNP might impact spliceosome assembly. We observed small differences in U6 sedimentation in glycerol gradients, with a more lowly abundant, earlier sedimenting U6-containing fraction appearing in addition to co-sedimentation with U4 (compare U6 and U4 in lanes 3-6 in Figure 1B and S1C), suggesting a U6-containing complex without U4. Consistent with this, we note that the migration of Pof8, Bmc1, and Thc1 does not fully overlap with U4/U6 in the gradient, but is rather shifted towards lighter fractions, arguing against the complete inclusion of the Bmc1-Pof8-Thc1 complex in the U4/U6 di-snRNP (Figure 1B, S1C). As the earlier sedimenting U6 species is not evident in Bmc1 and Pof8 KO strains (compare U6 and U4 in lanes 3-6 in Figure 1B and S1C relative to Bmc1 and Pof8 KO strains), we hypothesized that Bmc1, Pof8, and Thc1 interact with U6 before the U4/U6 di-snRNP.

To obtain clearer resolution of distinct U6-containing complexes, we ran cell extracts on native gels and analyzed spliceosomal RNAs by northern blotting. We observed a single, prominent band for all spliceosomal RNAs except U6, which migrated as 2 distinct complexes (Figure 2A). We could assign the higher molecular weight complex, which comigrates with U4 but not U2 or U5, as the U4/U6 di-snRNP. The U4/U6 di-snRNP, as well as other spliceosomal snRNPs and the non-spliceosomal U3 snRNP, showed no change in relative intensity or migration upon deletion of Bmc1, Pof8, Thc1, or sno530. However, we did observe a significant and reproducible decrease in the intensity of the lower molecular weight U6-containing snRNP upon deletion of Bmc1, Pof8, and Thc1 (Figure 2A, B), consistent with this band likely representing the Bmc1-containing U6 snRNP. The persistence of this complex upon loss of sno530 suggests that complex formation is not reliant on the ability to modify U6 at A64. Although U6 and sno530 are associated with Bmc1 (Figure 1A), sno530 is therefore not required for the stability of the U6 snRNP observed in native gels.

To understand when Bmc1 interacts with U6 with respect to spliceosome formation, we extracted Bmc1 immunoprecipitated RNPs under native conditions and ran total and Bmc1-associated RNA on native gels. Bmc1-bound U6 did not co-migrate with the U4/U6 di-snRNP (Figure 2C), suggesting that Bmc1 interacts with U6 outside of the U4/U6 di-snRNP, in line with the Bmc1-sensitive mono U6 snRNP band (2A, B). Based on these results, we hypothesize that the Bmc1-containing U6 complex, which promotes 5' capping and 2'-O-methylation, forms upstream of the U4/U6 di-snRNP.

Native fission yeast cell extracts do not form detectable amounts of the U4/U6.U5 tri-snRNP (41, 42), so we focused our further efforts on examining U4/U6 base pairing by performing a solution hybridization assay on cold phenol-extracted total RNA to maintain U4/U6 base pairing (Figure 2D). This differs from native spliceosomal snRNP gels (Figure 2A) in that it only assesses RNA-RNA interactions, without changes in mobility due to protein binding. We detected minor defects in U4/U6 assembly upon Bmc1, Pof8, or Thc1 deletion, as measured by the increase in "free" U4 relative to U4 complexed in the di-snRNP, although the increase in the fraction of free U4 only reached statistical significance in the Pof8 knockout strain (Figure 2D, E). Consistent with the increase in free U4 in the knockout strains, glycerol gradients revealed an increase in earlier sedimenting U4 in the knockout strains (Figure 1B, S1B, compare lanes 1-3 in wild type versus knockouts). Although U6 is in excess over U4, the appearance of free U4 in the knockouts suggests that the absence of Bmc1, Pof8, and Thc1 may result in a non-functional, alternate pathway for U4 that does not involve U4/U6 di-snRNP formation. The lack of U4/U6 pairing defects upon the loss of sno530 further suggests that it is largely the Bmc1-Pof8-Thc1 protein complex dictating U4/U6 pairing, not the single A64 2'-O-methylation. Still, UV melt analysis of the U6-interacting region of U4 and the U6 internal stem loop (ISL), with or without 2'-O-



methylation of A64, revealed a slight increase in U4-U6 duplex stability with 2'-O-methylation, consistent with previous findings reporting on the stabilizing properties of 2'-O-methylation on RNA duplex formation (43–45) (Figure 2F).

Subsequent steps in spliceosome formation involve unwinding of the U6 ISL and forming base pairing between U4 and U6, both of which are promoted by the U4/U6 di-snRNP assembly factor Prp24 (46, 47). We generated an endogenously tagged Prp24 strain and assessed the interaction between Prp24 and U4 and U6. In line with our findings that Bmc1, Pof8, and Thc1 promote U4/U6 base pair formation, Pof8 and Bmc1 deletion resulted in a decreased interaction between Prp24 and U4 and U6, suggesting that Bmc1 and Pof8 promote the association of U4 and U6 with Prp24, which in turn promotes the formation of the U4/U6 di-snRNP (Figure 2G, H). In sum, our results are consistent with the existence of a Bmc1/Pof8/Thc1-containing U6 snRNP, with Bmc1/Pof8/Thc1 dissociating from U6 during establishment of the U4/U6 di-snRNP, and with the formed U4/U6 di-snRNP being less stable in the absence of the Bmc1/Pof8/Thc1 complex.

### **Bmc1 globally affects splicing at elevated temperatures**

Having observed Bmc1-dependent defects in U4/U6 di-snRNP formation, we tested the effects of Bmc1 deletion on pre-mRNA splicing. To that end, we performed short-read, paired-end sequencing on RNA extracted from wild type and Bmc1 knockout yeast strains and quantified intron retention as a proxy for splicing efficiency (48). We also measured intron retention in wild type and knockout cells grown at 42 degrees, which has been shown to impact splicing in fission yeast (49). We detected no transcriptome-wide changes in intron retention in cells grown at 32 degrees, but noted a global increase in intron retention at 42 degrees, which was further exacerbated upon deletion of Bmc1 (Figure 3A). While intron retention in Bmc1 knockout cells increased transcriptome-wide, this was not the case for all introns. This prompted us to investigate whether certain intron features might correlate with sensitivity to Bmc1 deletion. Given recent findings that ribosomal protein genes (RPGs) are spliced faster than non-ribosomal protein genes (nRPGs) in *S. cerevisiae* due to stronger branch point, poly-U tract, and 3' splice site sequences (50), we repeated our intron retention analysis after separating RPGs and nRPGs (Figure 3B, supplementary dataset 1). In line with the idea that efficiently spliced RPGs may not require optimal conditions for splicing, we detected no difference in RPG intron retention between wild type and Bmc1 knockout cells at either temperature, while nRPGs exhibited a significant increase in intron retention at 42 degrees in Bmc1 knockout cells. This suggests that Bmc1 is important for fine-tuning splicing of nRPGs with non-optimal sequence contexts. We validated these findings with semi-quantitative RT-PCR, showing that RPG splicing (*rpl1603*, Figure 3C) remains unchanged upon temperature shift and Bmc1 deletion, whereas Bmc1 promotes the splicing of nRPGs, particularly at elevated temperatures (Figure 3D-F).

### **Bmc1 5' capping catalytic activity is not required for promoting 2'-O-methylation of U6**

With previous studies indicating that Bmc1 5'  $\gamma$ -phosphate methyltransferase catalytic activity is dispensable for telomerase activity (34), we assayed a combination of previously described and newly constructed putative Bmc1 catalytic mutants for the ability to promote U6 2'-O-methylation. We mutated residues that are both highly conserved between Bmc1 and human MePCE, and well-positioned in structure predictions to interact with the methyltransferase byproduct SAH (Figure 4A). HA-tagged Bmc1 mutants were transformed into a Bmc1 knockout yeast strain and profiled for U6 2'-O-methylation as above (Figure 4B, C). While the Bmc1 mutants were more lowly expressed than wild type Bmc1, some mutants still promoted 2'-O-methylation to a greater extent than the empty vector (Figure 4C). Further, normalization of relative 2'-O-methylation levels to Bmc1 expression confirmed a statistically significant increase in 2'-O-methylation for all Bmc1 mutants compared to the empty vector (Figure 4D). This suggests that, as in telomerase, Bmc1 5'  $\gamma$ -phosphate methyltransferase catalytic activity is not critical for its function in U6 2'-O-methylation.

For further characterization of Bmc1 catalytic mutants, we chose the Bmc1 L153A V155A mutant, which showed the highest expression across biological replicates. As measured by co-immunoprecipitation, L153A V155A still interacted with Pof8, suggesting that catalytic activity is also not required for complex formation (Figure 4E). Further, L153A V155A interacted with U6, indicating that 5'  $\gamma$ -phosphate methyltransferase catalytic activity is not required for U6 binding (Figure 4E).

### **The xRRM and Pof8-Lsm2-8 interaction are important determinants for U6 2'-O-methylation**

As an established member of the LARP7 family of proteins, the protein-interacting and RNA binding domains of Pof8 have been well-characterized in the context of the telomerase RNP (29–33). Pof8 contains a divergent La motif that lacks the conserved uridylate-binding residues typically seen in LARP7 proteins (31), so its interaction with the telomerase RNA TER1 is mediated by the RRM1, xRRM, and the N-terminal region that makes direct protein-protein contacts to Lsm2-8, which in turn binds the uridylate-rich 3' end of TER1 (29–32). As mutations to these regions have been shown to impair Pof8 binding to TER1 and telomere length homeostasis, we looked at the impact of these same mutations on U6 2'-O-methylation (Figure 5A). In contrast to what has been observed for TER1, where both RRMs are important for binding, only mutations to the xRRM and the Lsm2-8 binding region caused a significant reduction in 2'-O-methylation at A64 (Figure 5B, C).

To further understand the molecular basis for the drop in 2'-O-methylation, we immunoprecipitated Bmc1 in a Pof8 knockout strain re-expressing the Pof8 mutants (Figure 5D, E). Bmc1 co-immunoprecipitated all Pof8 mutants, suggesting that the 2'-O-methylation defect is not due to complete disruption of the Bmc1-Pof8 interaction (Figure 5D). The Bmc1-U6 interaction, which is dependent on the presence of Pof8 (Figure 1A), was almost completely lost in the Lsm2-8-binding mutant ( $\Delta 2-10$ ), suggesting that its 2'-O-methylation defect may be due to a loss in U6 association with the Bmc1-Pof8-Thc1 complex (Figure 5D, E). Surprisingly, we detected no loss in U6 binding with the xRRM mutant, indicating that while U6 still interacts with the Bmc1-Pof8-Thc1 snRNP in the context of the xRRM mutant, the xRRM may have another function in facilitating U6 2'-O-methylation (Figure 5D, E), potentially through the binding of the snoRNA, as has been suggested for human LARP7 (27). Alternatively, as the xRRM in the ciliate LARP7 protein p65 has been suggested to possess RNA chaperone activity to remodel the ciliate telomerase RNA (51, 52), it is tempting to speculate that similar xRRM-mediated RNA chaperone activity may play a role in correctly positioning U6 for 2'-O-methylation.

## **Discussion**

### **Conserved functions for LARP7 family proteins in U6 2'-O-methylation**

This work represents the first report of an MePCE homolog with a role in splicing and spliceosome assembly, beyond 5' methylphosphate cap addition of U6. In our efforts to investigate functions for Bmc1 beyond telomerase, we revealed an unanticipated overlap between components of the yeast telomerase holoenzyme and a U6-containing snRNP. While it is surprising that Bmc1, Pof8, Thc1, and Lsm2-8 interact with 2 very distinct non-coding RNAs produced by different polymerases, both RNAs possess uridylate-rich sequences recognized by Lsm2-8 and highly structured regions, including stem loops in U6 and pseudoknots in telomerase, that act as scaffolds to recruit other RNP components. These common features may provide an explanation as to why these divergent RNAs share a common set of protein binding partners. Such RNP plasticity is not unique to fission yeast telomerase and U6, but may represent a shared feature of LARP7 and MePCE family proteins. Mammalian LARP7 and MePCE are particularly well-studied for their roles in capping and stabilizing the 7SK snRNP (8, 25, 54, 55), transcriptional control through DDX21 (38), directing U6 modification (26, 27), and snRNP assembly through the SMN complex (56). Thus, continuing to study the RNA interactome of MePCE and LARP7 homologs across species will likely yield additional insight into how these proteins associate with and influence various classes of non-coding RNAs. It is also possible that

Bmc1, Pof8, and Thc1 interactions with U6 are mediated entirely by direct interactions with Lsm2-8, which in turn directly contacts U6, much like Prp24 interacts with U6 by directly binding Lsm2-8 (53). Future structural and biochemical studies will lend insight into the protein-protein and protein-RNA interactions that cooperate to form the U6 snRNP.

Several fungal species, including *S. cerevisiae*, lack both a LARP7 and MePCE homolog (19, 20). As deletion or depletion of LARP7/Pof8 or MePCE/Bmc1 does not influence U6 stability in species where this has been investigated (8, 20, 26, 27, 34), the function of LARP7 and MePCE family members in U6 biogenesis and function has remained unclear. This work expands our understanding of the evolutionary conservation of LARP7 family members, with shared or unique functions relating to the telomerase, U6, and 7SK RNAs, depending on the species under investigation (Figure 6A). Further links can be drawn between the functional consequences of LARP7- and Pof8-mediated promotion of U6 2'-O-methylation. LARP7 or Pof8 deletion and the subsequent decrease in 2'-O-methylation of U6 results in no functional consequences under standard physiological conditions, but becomes important for maintaining splicing fidelity under heat stress, in the case of human LARP7, and male germ cells in mice (26, 27). As the loss of A64 modification alone results in no changes to U4/U6 di-snRNP assembly and stability, compared to the changes observed upon Bmc1, Pof8, and Thc1 deletion, we anticipate that it is either a combination of the loss of several 2'-O-methylations or the loss of the Bmc1-Pof8-Thc1 U6 snRNP that leads to increased intron retention at elevated temperatures upon Bmc1 deletion (Figure 3). Future studies aimed at teasing apart this mechanism in mammalian and yeast cells will provide additional insight into the intertwining role of RNA modifications and RNP biogenesis complexes in spliceosome assembly.

### **Emerging importance of the xRRM in RNA folding and function**

Fission yeast, possessing a LARP7 homolog that functions in telomerase like its ciliate counterpart (20, 29–34), and U6 2'-O-methylation in an analogous manner to its mammalian homologs, may represent an evolutionary intermediate bridging RNA binding proteins between ciliates and mammals. The 7SK snRNA, which has only been found in animals (57) likely arose independently from the more widely distributed LARP7 and MePCE, suggesting the need for continued studies into 7SK-independent functions for LARP7 and MePCE. Of note, the conservation of the xRRM between fungal, mammalian, and ciliate LARP7 proteins, rather than the La motif (19, 20, 29–31) may provide a reason explaining the diverse RNA substrates bound by LARP7 homologs, compared to the more well-conserved classes of RNA binding partners of other LARPs across species (19). xRRM-mediated binding to structured stem loops like the telomerase RNA pseudoknot (32), SL4 of 7SK (58), and U6-modifying snoRNAs (27) may be a better determinant than 3' terminal uridylate stretches for predicting LARP7 binding. The importance of the xRRM in the biogenesis and stability of telomerase RNA, 7SK, and U6 may be linked to its RNA chaperone activity, which has been proposed to have a role in promoting RNA folding (51, 52). Our finding that mutation of the xRRM of Pof8 impairs 2'-O-methylation of U6 without disrupting U6 binding (Figure 5D) may provide further evidence that the xRRM has functions beyond U6 binding and raises additional questions as to the mechanism by which RNA chaperones can coordinate snoRNA and target RNA binding to carry out efficient 2'-O-methylation. Importantly, xRRM chaperone activity is not limited to LARP7 family proteins, as the RRM2/xRRM of the human La protein has also been shown to promote RNA folding (59–61).

### **New insights into U6 biogenesis in fission yeast**

This work also sheds light on the timing of U6 biogenesis steps in fission yeast (Figure 6B). We have previously shown that Lsm2-8 interacts with both mature and intron-containing U6, suggesting that intron removal occurs after 3' end processing and the switch from La to Lsm2-8 (20, 23). Conversely, Bmc1 and Pof8 interact solely with the spliced form of U6 (20). This, coupled with our finding that the Lsm2-8-interacting region of Pof8 is required for the Bmc1-U6 interaction (Figure 5D, E), indicates that Lsm2-8 binding occurs prior to splicing and recruitment



of the Bmc1-Pof8-Thc1 complex. Our data indicating that Bmc1 co-purifies with U6-modifying snoRNAs (Figure 1 and Figure S2) suggests that U6 then undergoes 5' capping by Bmc1 and 2'-O-methylation, prior to Bmc1-Pof8-Thc1 dissociation from U6 and U4/U6 di-snRNP assembly mediated by Prp24. Since deletion of Bmc1 or Pof8 results in decreased association of Prp24 with U4 and U6 (Figure 2), the Bmc1-Pof8-Thc1 complex may play a role in the handoff to Prp24. This role may be mediated by xRRM-linked chaperone activity that remodels U6 to better position it to interact with Prp24 and U4. Our finding of a new U6 biogenesis complex thus adds another layer of regulation to spliceosome assembly. Still, it remains unknown whether Bmc1, Pof8, and Thc1 only interact with U6 during its biogenesis, or re-associate with U6 when it is reassembled into the U4/U6 di-snRNP for subsequent rounds of splicing catalysis. Notably, our finding of a mono-U6 snRNP containing Bmc1 and Pof8 that promotes internal modifications of U6 is consistent with earlier reports of the human m<sup>6</sup>A methyltransferase METTL16 present in a mono-U6 snRNP with MePCE and LARP7 (62). Since mammalian U6 also undergoes 5' methylphosphate capping by MePCE and LARP7-mediated 2'-O-methylation, it will be interesting to examine the interplay between MePCE, LARP7, and METTL16, and how these factors may function in promoting the formation of the U4/U6 di-snRNP in higher systems.

Taken together, this work adds to the growing body of literature on the catalytic-independent functions of RNA modification enzymes (reviewed in (63)). While this raises questions as to the precise function of Bmc1 catalytic activity on the 5' end of U6, *in vitro* binding assays showed that catalytic activity of the human MePCE promotes 7SK retention following catalysis (64). It remains to be found if this extends to other MePCE/Bmc1 targets like U6, and how U6 snRNP assembly may be regulated in species lacking MePCE/Bmc1 and LARP7 homologs.

## Materials and Methods

### Yeast strains and growth

Strains were grown at 32°C in yeast extract with supplements (YES) or Edinburgh Minimal Media (EMM), as indicated. Tag integration and knockouts were generated as described in (20) (primer sequences provided in supplementary table 1). A list of yeast strains is provided in supplementary table 2.

### Native protein extracts and immunoprecipitation

Native protein extractions and immunoprecipitations were carried out as described in (20). Protein A-tagged strains were immunoprecipitated with Rabbit IgG-conjugated (MP-Biomedicals, SKU 085594) Dynabeads (Invitrogen, 14301) (65) and myc- and HA-tagged proteins were immunoprecipitated with Protein A/G beads (GeneBio, 22202B-1) coated with anti-myc antibody (Cell signaling, 2276S) at a dilution of 1:250 or anti-HA antibody (Cell signaling, 3724S) at a dilution of 1:50. Total RNA was isolated from cell extracts with 0.5% SDS, 0.2 mg/mL Proteinase K (Sigma, P2308), 20 mM Tris HCl pH 7.5, and 10 mM EDTA pH 8.0 for 15 minutes at 50°C, followed by phenol: chloroform: isoamyl (25:24:1) extraction and ethanol precipitation. Immunoprecipitated RNA was isolated by incubating beads in 0.1% SDS and 0.2 mg/mL Proteinase K for 30 minutes at 37°C, followed by phenol: chloroform: isoamyl alcohol extraction. For native northern blots, input RNA was extracted in the same manner as immunoprecipitated RNA. Relative immunoprecipitation efficiency was calculated by dividing the IP signal by the input signal. Western blots were performed using anti-myc (Cell signaling, 2276S) at 1:5000, anti-beta actin (Abcam, ab8226) at 1:1250, HRP-conjugated anti-mouse (Cell signaling, 7076) at 1:5000, anti-HA (Cell signaling, 3724S) at 1:1000, HRP-conjugated anti-rabbit (Cell signaling, 7074S) at 1:5000, or HRP-conjugated polyclonal anti-Protein A (Invitrogen, PA1-26853) at 1:5000.

### RNA preparation, northern blotting, 2'-O-methylation detection, and solution hybridization

Total RNA was extracted with hot phenol, separated on 10% TBE-urea polyacrylamide gels, and transferred to positively charged nylon membranes (Perkin Elmer, NEF988001) as per (66). For native RNA extraction to detect U4/U6 duplexes, RNA was extracted with cold phenol, as per

(67). Solution hybridization was performed as per (68) and resolved on 9% TBE gels. Probe sequences for  $^{32}\text{P}$   $\gamma$ -ATP-labeled DNA probes for northern blotting are provided in supplementary table 3. Primer extensions to detect 2'-O-methylation were performed based on protocols from (35). Briefly, 5  $\mu\text{g}$  RNA was incubated for 5 minutes at 85°C in a 10  $\mu\text{L}$  reaction containing  $^{32}\text{P}$   $\gamma$ -ATP-labeled probe, 50 mM Tris HCl pH 7.4, 60 mM NaCl, then transferred to 55°C for 20 minutes to allow the probe to anneal. Reverse transcription was carried out with 1.5 mM (high concentration) or 0.1 mM (limiting concentration) dNTP mix and 2.5 U AMV-RT (NEB, M0277S) and 1 hour incubation at 42°C. cDNA products were separated on 8% TBE-urea sequencing gels, dried, and exposed to Phosphor screens overnight. Relative 2'-O-methylation was calculated by determining the ratio of each RT stop relative to the total signal in each lane (all RT stops and full length U6). 2'-O-methylations were also detected by RNase H (NEB, M0297S) digestion of 2  $\mu\text{g}$  with 25 pmol chimeric RNA-DNA probes, as per (37). Probe sequences targeting C57 and A64 2'-O-methylations are provided in supplementary table 3.

#### **qRT-PCR and semi-quantitative RT-PCR**

1  $\mu\text{g}$  TURBO DNase-treated RNA was reverse transcribed with the iScript cDNA reverse transcription kit (Biorad, 1708890) or 5 U AMV-RT (NEB, M0277S) and gene-specific reverse primers. qRT-PCR was performed with the SensiFAST SYBR No-Rox kit (Bioline, BIO-98005) and 1  $\mu\text{M}$  of each primer, with settings outlined in (20). For semi-quantitative RT-PCR, cDNA was amplified with Taq polymerase (NEB, M0273L) using the following cycling conditions: 5 min initial denaturation at 94°C, 26 (pud1, alp41) or 27 (rpl1603, bor1) cycles of 30 s at 94°C, 30 s at 50°C, and 1 minute at 72°C, and a final 5 minute extension at 72°C. cDNA was resolved on 10% TBE gels.

#### **Native yeast extract preparation, native snRNP gels, and glycerol gradient sedimentation**

Pellets from 1 L yeast cultures were resuspended to 1 g/mL in AGK400 buffer (10 mM HEPES KOH pH 7.9, 400 mM KCl, 1.5 mM  $\text{MgCl}_2$ , 0.5 mM DTT, 1 mM PMSF, and protease inhibitor cocktail (Sigma, P8215)), frozen in liquid nitrogen, and ground to fine powder with a mortar and pestle. Powder was thawed on ice and spun in a JA 25.50 rotor (Beckman) for 16 minutes at 15,000 rpm and the supernatant was subsequently spun in a 70.1 Ti rotor (Beckman) for 45 minutes at 50,000 rpm to pellet ribosomes and heavy molecular weight complexes. Supernatants were flash frozen and stored at -80°C. For native snRNP gels, glycerol with xylene cyanol and bromophenol blue was added to 30  $\mu\text{g}$  cell extract (final glycerol concentration= 10%) and fractionated on 4% 19:1 acrylamide: bis-acrylamide native gels (15 cm x 18 cm) for 220 minutes at 240 V and 4 degrees, then transferred to nylon membranes for northern blotting. For glycerol gradients, cell extracts from 1.0 g frozen cell powder were layered on an 11 mL 10-30% glycerol gradient (50 mM Tris HCl pH 7.4, 25 mM NaCl, 5 mM  $\text{MgCl}_2$ ) and spun in an SW41Ti rotor (Beckman) for 20 hours at 30,900 rpm. Fractions were collected starting from the top of the gradient and RNA and proteins were extracted with phenol: chloroform: isoamyl alcohol (25:24:1) and TCA precipitation, respectively.

#### **UV melt curves**

UV melt curves were recorded on a Cary BIO 100 spectrometer with a 6 x 6 temperature-controlled cell holder. 2  $\mu\text{L}$  10 mM U4 and modified or unmodified U6 RNA oligos in 96  $\mu\text{L}$  buffer (10 mM  $\text{KH}_2\text{PO}_4$  pH 7.0 and 200 mM KCl) was heated and cooled from 50°C to 65°C at a rate of 2°C per minute without collecting data, then re-heated and cooled while monitoring absorbance at 260 nm at 1°C intervals. Absorbance at 260 nm at each temperature point was normalized to absorbance at 50°C and absorbance curves were fitted with an equation for one site specific binding with a Hill slope to determine  $T_m$  values. RNA sequences are provided in supplementary table 3.

#### **RNA Seq and intron retention analysis**

DNase-treated RNA was rRNA-depleted (Qiagen, 334215) and stranded libraries were prepared by Genome Québec. cDNA libraries were sequenced on a NovaSeq6000 with 150 bp paired-end

reads. Reads were aligned to the fission yeast genome (ASM294v2) with Bowtie2 (69). Intron retention was quantified using IRFinder (version 2.0.1), as per (48). Any introns flagged as having a low sequencing depth or fewer than 4 reads to support splicing were not considered for statistical analysis. Average intron retention across 3 biological replicates was used to examine differential intron retention (Mann-Whitney test).

### Data availability

The data supporting the findings of this study are available from the corresponding author upon reasonable request. RNA Seq data have been deposited in NCBI's Sequence Read Archive (SRA) database under BioProject number PRJNA918556.

### Acknowledgments

We thank Dave Brow for comments on the manuscript. J.P. is supported by a Canada Graduate Scholarship (Doctoral) from the National Sciences and Engineering Research Council of Canada. M.A.B. is supported by a Discovery Grant from NSERC ("Impact of chemical modification of noncoding RNAs on gene expression in *S. pombe*"). S.D.R. is supported by a Discovery Grant from NSERC ("The molecular mechanism of U6 snRNA activation for pre-mRNA splicing") and a Sector Innovation Program Grant from GenomeBC (RC18-3517). This research was enabled in part by support provided by the BC DRI Group and the Digital Research Alliance of Canada ([alliancecan.ca](http://alliancecan.ca)).

### References

1. M. E. Wilkinson, C. Charenton, K. Nagai, RNA Splicing by the Spliceosome. *Annu. Rev. Biochem.* **89**, 359–388 (2020).
2. I. Cvitkovic, M. S. Jurica, Spliceosome database: a tool for tracking components of the spliceosome. *Nucleic Acids Res.* **41** (2013).
3. S. M. Fica, *et al.*, RNA catalyzes nuclear pre-mRNA splicing. *Nature* **503**, 229 (2013).
4. K. Eysmont, *et al.*, Rearrangements within the U6 snRNA Core during the Transition between the Two Catalytic Steps of Splicing. *Mol. Cell* **75**, 538-548.e3 (2019).
5. A. L. Didychuk, S. E. Butcher, D. A. Brow, The life of U6 small nuclear RNA, from cradle to grave. *RNA* **24**, 437–460 (2018).
6. D. A. Brow, C. Guthrie, Spliceosomal RNA U6 is remarkably conserved from yeast to mammals. *Nature* **334**, 213–218 (1988).
7. R. Singh, R. Reddy,  $\gamma$ -Methyl phosphate: A cap structure in spliceosomal U6 small nuclear RNA (mRNA splicing/RNA processing/RNA modification). *Proc. Natl. Acad. Sci. USA* **86**, 8280–8283 (1989).
8. C. Jeronimo, *et al.*, Systematic Analysis of the Protein Interaction Network for the Human Transcription Machinery Reveals the Identity of the 7SK Capping Enzyme. *Mol. Cell* **27**, 262–274 (2007).
9. M. S. Cosgrove, Y. Ding, W. A. Rennie, M. J. Lane, S. D. Hanes, The bin3 RNA methyltransferase targets 7SK RNA to control transcription and translation. *Wiley Interdiscip. Rev. RNA* (2012) <https://doi.org/10.1080/09540121.2017.1344767>.
10. R. Singh, R., Gupta, S., and Reddy, Capping of mammalian U6 small nuclear RNA in vitro is directed by a conserved stem-loop and AUAUAC sequence: conversion of a noncapped RNA into a capped RNA. *Mol. Cell. Biol.* **10**, 939–946 (1990).

11. A. Huppler, L. J. Nikstad, A. M. Allmann, D. A. Brow, S. E. Butcher, Metal binding and base ionization in the u6 rna intramolecular stem-loop structure. *Nat. Struct. Biol.* **9**, 431–435 (2002).
12. R. Reddy, H. Busch, “Small Nuclear RNAs: RNA Sequences, Structure, and Modifications” in *Structure and Function of Major and Minor Small Nuclear Ribonucleoprotein Particles*, (1988) [https://doi.org/10.1007/978-3-642-73020-7\\_1](https://doi.org/10.1007/978-3-642-73020-7_1).
13. J. Gu, J. R. Patton, S. Shimba, R. Reddy, Localization of modified nucleotides in *Schizosaccharomyces pombe* spliceosomal small nuclear RNAs: Modified nucleotides are clustered in functionally important regions. *RNA* **2**, 909–918 (1996).
14. T. Tani, Y. Ohshima, The gene for the U6 small nuclear RNA in fission yeast has an intron. *Nature* **337**, 87–90 (1989).
15. T. Tani, Y. Ohshima, mRNA-type introns in U6 small nuclear RNA genes: Implications for the catalysis in pre-mRNA splicing. *Genes Dev.* **5**, 1022–1031 (1991).
16. J. Potashkin, D. Frendewey, Splicing of the U6 RNA precursor is impaired in fission yeast pre-mRNA splicing mutants. *Nucleic Acids Res.* **17**, 7821–7831 (1989).
17. D. Frendewey, I. Barta, M. Gillespie, J. Potashkin, *Schizosaccharomyces* U6 genes have a sequence within their introns that matches the B box consensus of tRNA internal promoters. *Nucleic Acids Res.* **18**, 2025–2032 (1990).
18. D. A. Brow, C. Guthrie, Splicing a spliceosomal RNA. *Nature* **337**, 14–15 (1989).
19. J.-M. M. Deragon, Distribution, organization and evolutionary history of La and LARPs in eukaryotes. *RNA Biol.* **18**, 1–9 (2020).
20. J. Porat, M. El Baidouri, J. Grigull, J.-M. Deragon, M. A. Bayfield, The methyl phosphate capping enzyme Bmc1/Bin3 is a stable component of the fission yeast telomerase holoenzyme. *Nat. Commun.* **13**, 1277 (2022).
21. J. Rinke, J. A. Steitz, Association of the lupus antigen La with a subset of U6 snRNA molecules. *Nucleic Acids Res.* **13**, 2617–2629 (1985).
22. E. J. Montemayor, *et al.*, Architecture of the U6 snRNP reveals specific recognition of 3'-end processed U6 snRNA. *Nat. Commun.* **9** (2018).
23. E. J. Montemayor, *et al.*, Molecular basis for the distinct cellular functions of the Lsm1-7 and Lsm2-8 complexes. *RNA* **26**, 1400–1413 (2020).
24. X. Fu, *et al.*, Identification of transient intermediates during spliceosome activation by single molecule fluorescence microscopy. *Proc. Natl. Acad. Sci. U. S. A.* **119**, e2206815119 (2022).
25. N. He, *et al.*, A La-Related Protein Modulates 7SK snRNP Integrity to Suppress P-TEFb-Dependent Transcriptional Elongation and Tumorigenesis. *Mol. Cell* **29**, 588–599 (2008).
26. X. Wang, *et al.*, LARP7-Mediated U6 snRNA Modification Ensures Splicing Fidelity and Spermatogenesis in Mice. *Mol. Cell* **77**, 999-1013.e6 (2020).
27. D. Hasler, *et al.*, The Alzami Syndrome-Associated Protein LARP7 Guides U6 Small Nuclear RNA Modification and Contributes to Splicing Robustness. *Mol. Cell* **77**, 1014-1031.e13 (2020).

28. K. L. Witkin, K. Collins, Holoenzyme proteins required for the physiological assembly and activity of telomerase. *Genes Dev.* **18**, 1107–1118 (2004).
29. L. C. Collopy, *et al.*, LARP7 family proteins have conserved function in telomerase assembly. *Nat. Commun.* **9**, 557 (2018).
30. A. K. Mennie, B. A. Moser, T. M. Nakamura, LARP7-like protein Pof8 regulates telomerase assembly and poly(A)+TERRA expression in fission yeast. *Nat. Commun.* (2018) <https://doi.org/10.1038/s41467-018-02874-0>.
31. D. J. Páez-Moscoso, *et al.*, Pof8 is a La-related protein and a constitutive component of telomerase in fission yeast. *Nat. Commun.* **9**, 587 (2018).
32. X. Hu, *et al.*, Quality-Control Mechanism for Telomerase RNA Folding in the Cell. *Cell Rep.* **33** (2020).
33. R. Basu, C. D. Eichhorn, R. Cheng, R. D. Peterson, J. Feigon, Structure of *S. pombe* telomerase protein Pof8 C-terminal domain is an xRRM conserved among LARP7 proteins. *RNA Biol.* **18**, 1181–1192 (2020).
34. D. J. Páez-Moscoso, *et al.*, A putative cap binding protein and the methyl phosphate capping enzyme Bin3/MePCE function in telomerase biogenesis. *Nat. Commun.* **13**, 1067 (2022).
35. H. Zhou, Y. Q. Chen, Y. P. Du, L. H. Qu, The *Schizosaccharomyces pombe* mgU6-47 gene is required for 2'-O-methylation of U6 snRNA at A41. *Nucleic Acids Res.* **30**, 894–902 (2002).
36. T. M. Lowe, S. R. Eddy, A computational screen for methylation guide snoRNAs in yeast. *Science.* **283**, 1168–1171 (1999).
37. Y. T. Yu, M. Di Shu, J. A. Steitz, A new method for detecting sites of 2'-O-methylation in RNA molecules. *RNA* **3**, 324–331 (1997).
38. E. Calo, *et al.*, RNA helicase DDX21 coordinates transcription and ribosomal RNA processing. *Nature* **518**, 249–253 (2015).
39. R. W. Van Nues, *et al.*, Box C/D snoRNP catalysed methylation is aided by additional pre-rRNA base-pairing. *EMBO J.* **30**, 2420 (2011).
40. R. W. van Nues, N. J. Watkins, Unusual C'D' motifs enable box C/D snoRNPs to modify multiple sites in the same rRNA target region. *Nucleic Acids Res.* **45**, 2016–2028 (2017).
41. T. Huang, J. Vilardell, C. C. Query, Pre-spliceosome formation in *S.pombe* requires a stable complex of SF1-U2AF59-U2AF23. *EMBO J.* **21**, 5516–5526 (2002).
42. W. Chen, *et al.*, Endogenous U2•U5•U6 snRNA complexes in *S. pombe* are intron lariat spliceosomes. *RNA* **20**, 308–320 (2014).
43. P. Prusiner, N. Yathindra, M. Sundaralingam, Effect of ribose O(2')-methylation on the conformation of nucleosides and nucleotides. *BBA Sect. Nucleic Acids Protein Synth.* **366**, 115–123 (1974).
44. G. Kawai, *et al.*, Conformational Rigidity of Specific Pyrimidine Residues in tRNA Arises from Posttranscriptional Modifications That Enhance Steric Interaction between the Base and the 2'-Hydroxyl Group. *Biochemistry* **31**, 1040–1046 (1992).



45. H. Abou Assi, *et al.*, 2'-O-Methylation can increase the abundance and lifetime of alternative RNA conformational states. *Nucleic Acids Res.* **48**, 12365–12379 (2021).
46. A. Ghetti, M. Company, J. Abelson, Specificity of Prp24 binding to RNA: A role for Prp24 in the dynamic interaction of U4 and U6 snRNAs. *RNA* **1**, 132–145 (1995).
47. S. Martin-Tumasch, A. C. Richie, L. J. Clos, D. A. Brow, S. E. Butcher, A novel occluded RNA recognition motif in Prp24 unwinds the U6 RNA internal stem loop. *Nucleic Acids Res.* **39**, 7837–7847 (2011).
48. C. Lorenzi, *et al.*, IRFinder-S: a comprehensive suite to discover and explore intron retention. *Genome Biol.* **22**, 307 (2021).
49. A. R. Awan, A. Manfredo, J. A. Pleiss, Lariat sequencing in a unicellular yeast identifies regulated alternative splicing of exons that are evolutionarily conserved with humans. *Proc. Natl. Acad. Sci. U. S. A.* **110**, 12762–12767 (2013).
50. M. A. Gildea, Z. W. Dwyer, J. A. Pleiss, Transcript-specific determinants of pre-mRNA splicing revealed through in vivo kinetic analyses of the 1st and 2nd chemical steps. *Mol. Cell* **82**, 2967-2981.e6 (2022).
51. M. Singh, *et al.*, Structural Basis for Telomerase RNA Recognition and RNP Assembly by the Holoenzyme La Family Protein p65. *Mol. Cell* **47**, 16–26 (2012).
52. M. Singh, C. P. Choi, J. Feigon, xRRM: A new class of RRM found in the telomerase La family protein p65. *RNA Biol.* **10**, 353–359 (2013).
53. S. D. Rader, C. Guthrie, A conserved Lsm-interaction motif in Prp24 required for efficient U4/U6 di-snRNP formation. *RNA* **8**, 1378–1392 (2002).
54. B. J. Krueger, *et al.*, LARP7 is a stable component of the 7SK snRNP while P-TEFb, HEXIM1 and hnRNP A1 are reversibly associated. *Nucleic Acids Res.* **36**, 2219–2229 (2008).
55. A. Markert, *et al.*, The La-related protein LARP7 is a component of the 7SK ribonucleoprotein and affects transcription of cellular and viral polymerase II genes. *EMBO Rep.* **9**, 569–575 (2008).
56. C. Ji, *et al.*, Interaction of 7SK with the Ssn complex modulates snRNP production. *Nat. Commun.* **12**, 1278 (2021).
57. M. Marz, *et al.*, Evolution of 7SK RNA and its protein partners in metazoa. *Mol. Biol. Evol.* **26**, 2821–2830 (2009).
58. C. D. Eichhorn, Y. Yang, L. Repeta, J. Feigon, Structural basis for recognition of human 7SK long noncoding RNA by the La-related protein Larp7. *Proc. Natl. Acad. Sci. U. S. A.* **115**, E6457–E6466 (2018).
59. N. J. Kucera, M. E. Hodsdon, S. L. Wolin, An intrinsically disordered C terminus allows the la protein to assist the biogenesis of diverse noncoding RNA precursors. *Proc. Natl. Acad. Sci. U. S. A.* **108**, 1308–1313 (2011).
60. A. R. Naeeni, M. R. Conte, M. A. Bayfield, RNA chaperone activity of human La protein is mediated by variant RNA recognition motif. *J. Biol. Chem.* **287**, 5472–5482 (2012).
61. K. A. Brown, *et al.*, Distinct Dynamic Modes Enable the Engagement of Dissimilar Ligands

- in a Promiscuous Atypical RNA Recognition Motif. *Biochemistry* **55**, 7141–7150 (2016).
62. A. S. Warda, *et al.*, Human METTL16 is a N<sup>6</sup>-methyladenosine (m<sup>6</sup>A) methyltransferase that targets pre-mRNAs and various non-coding RNAs. *EMBO Rep.* **18**, 2004–2014 (2017).
  63. J. Porat, U. Kothe, M. A. Bayfield, Revisiting tRNA chaperones: New players in an ancient game. *RNA* **27**, 543–559 (2021).
  64. Y. Yang, C. D. Eichhorn, Y. Wang, D. Cascio, J. Feigon, Structural basis of 7SK RNA 5'- $\gamma$ -phosphate methylation and retention by MePCE. *Nat. Chem. Biol.* **15**, 132–140 (2019).
  65. A. Vakiloroyaei, N. S. Shah, M. Oeffinger, M. A. Bayfield, The RNA chaperone La promotes pre-tRNA maturation via indiscriminate binding of both native and misfolded targets. *Nucleic Acids Res.* **45**, 11341–11355 (2017).
  66. J. Porat, M. A. Bayfield, “Use of tRNA-Mediated Suppression to Assess RNA Chaperone Function” in *RNA Chaperones: Methods and Protocols*, T. Heise, Ed. (Springer US, 2020), pp. 107–120.
  67. J. E. Burke, S. E. Butcher, D. A. Brow, Spliceosome assembly in the absence of stable U4/U6 RNA pairing. *RNA* **21**, 923–934 (2015).
  68. M. L. Rodgers, A. L. Didychuk, S. E. Butcher, D. A. Brow, A. A. Hoskins, A multi-step model for facilitated unwinding of the yeast U4/U6 RNA duplex. *Nucleic Acids Res.* **44**, 10912–10928 (2016).
  69. B. Langmead, S. L. Salzberg, Fast gapped-read alignment with Bowtie 2. *Nat. Methods* **9** (2012).
  70. J. Jumper, *et al.*, Highly accurate protein structure prediction with AlphaFold. *Nature* **596**, 583–589 (2021).

## Figures

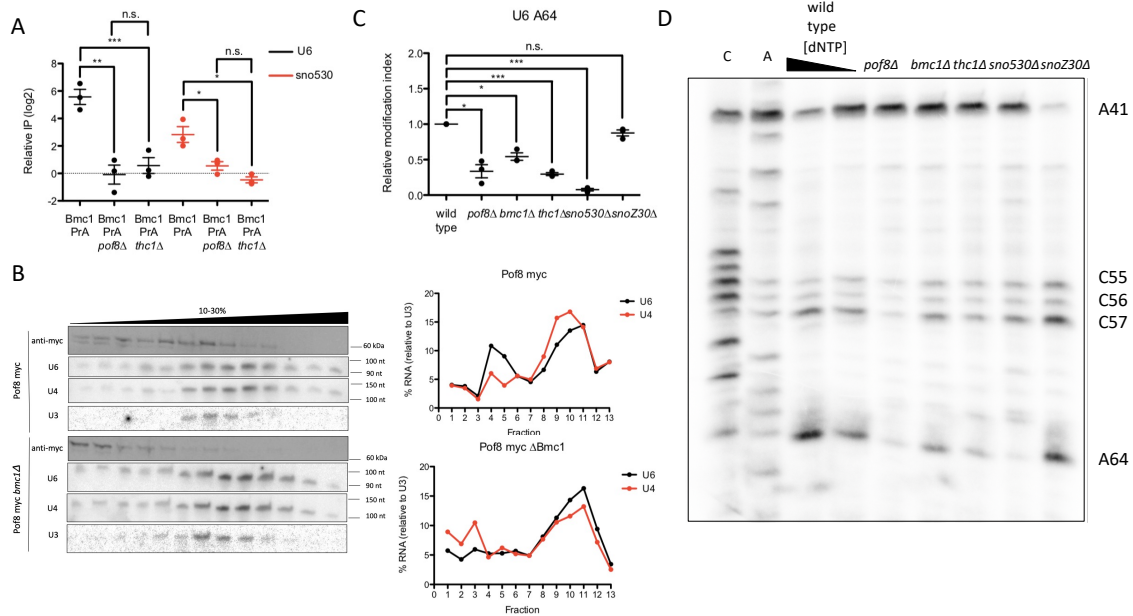

**Figure 1: BMC1, Pof8, and Thc1 promote 2'-O-methylation of U6**

A) qRT-PCR of U6 and sno530 in BMC1 PrA immunoprecipitates, normalized to immunoprecipitation from an untagged strain (mean  $\pm$  standard error, two-tailed unpaired *t* test, \* $p < 0.05$ , \*\* $p < 0.01$ , \*\*\*  $p < 0.001$ ) ( $n = 3$  biological replicates).

B) Glycerol gradient sedimentation of myc-tagged Pof8, U4, and U6, and U3 from wild type (*Pof8 myc*) and *bmc1Δ* strains. U4 and U6 signals were normalized to U3 for calculating relative migration in the gradient.

C) Quantification of relative 2'-O-methylation-induced reverse transcriptase stops at A64, compared to a wild type strain (mean  $\pm$  standard error, two-tailed unpaired *t* test, \* $p < 0.05$ , \*\* $p < 0.01$ , \*\*\*  $p < 0.001$ ) ( $n = 3$  biological replicates).

D) 2'-O-methylation primer extension of U6 at high (1.5 mM) and limiting (0.1 mM) dNTP concentrations. 2'-O-methylated sites are indicated.

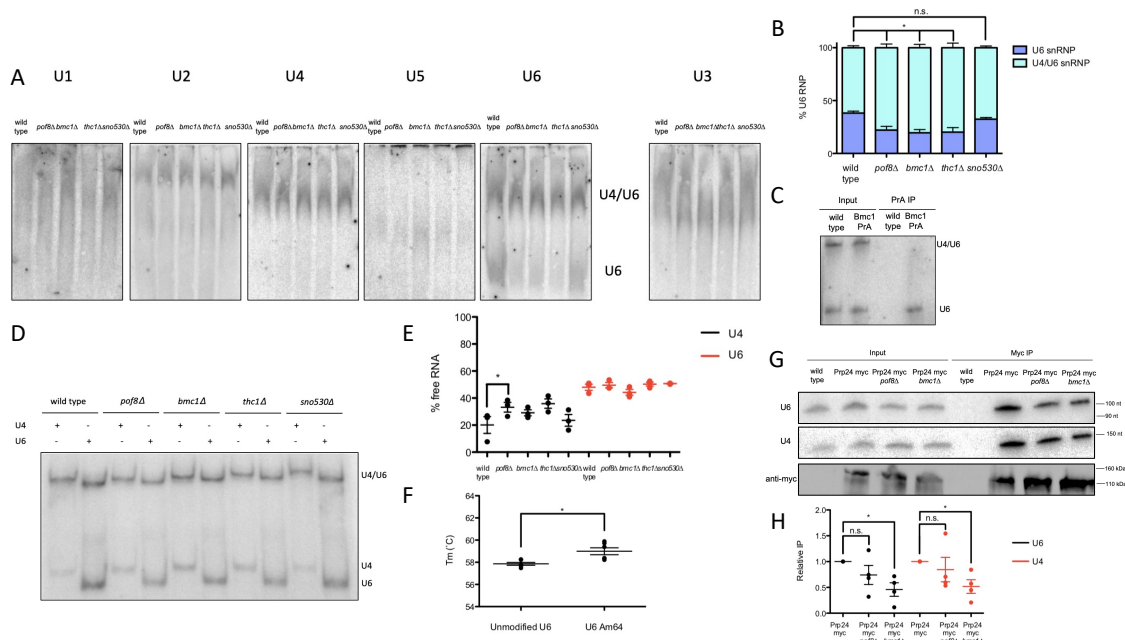

**Figure 2: Bmc1, Pof8, and Thc1 promote U4/U6 di-snRNP assembly**

A) Native northern blot analysis of spliceosomal and non-spliceosomal (U3) snRNPs from native yeast cell extracts.

B) Quantification of U6-containing snRNPs from wild type and knockout yeast cell extracts (mean± standard error, two-tailed unpaired *t* test, \**p*<0.05) (n= 4 biological replicates).

C) Native northern blot analysis of total and Bmc1-immunoprecipitated U6.

D) Solution hybridization of U4/U6 pairing in wild type and knockout yeast strains using radiolabeled probes targeting the 5' end of U4 and 3' end of U6.

E) Quantification of U4/U6 pairing from solution hybridization assay, expressed as the fraction of non-duplexed U4 and U6 ("free RNA") (mean± standard error, two-tailed unpaired *t* test, \**p*<0.05) (n= 3 biological replicates).

F) *T<sub>m</sub>* values from UV melt curve analysis of U4/U6 pairing with unmodified and A64-2'-O-methylated U6 oligos (mean± standard error, two-tailed unpaired *t* test, \**p*<0.05) (n= 6 technical replicates).

G) Northern and western blot analysis of U4, U6, and myc-tagged Prp24 from total cell extracts and myc-immunoprecipitates.

H) Quantification of Prp24-immunoprecipitated U4 and U6, relative to Prp24 myc (mean± standard error, two-tailed unpaired *t* test, \**p*<0.05) (n= 4 biological replicates).

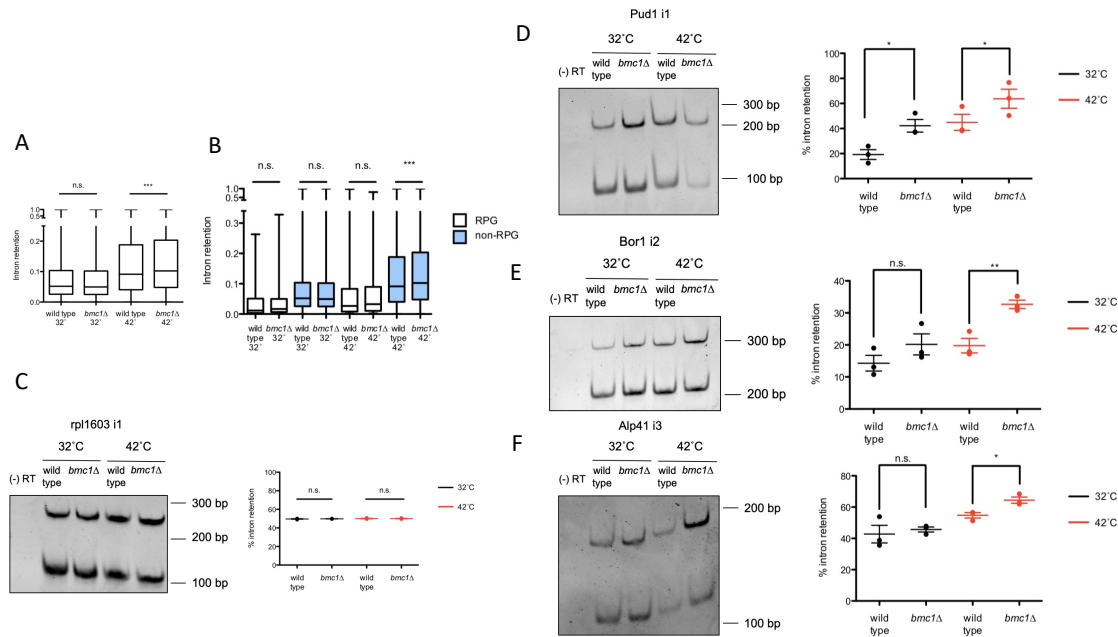

**Figure 3: BMC1 influences the splicing of non-ribosomal protein genes (nRPG) at elevated temperature**

A) Box plot of mean intron retention from wild type and *bmc1Δ* strains grown at 32°C and 42°C (Mann-Whitney test, \*\*\*  $p < 0.001$ ) ( $n = 3$  biological replicates).

B) Same as A), but separating RPGs and nRPGs.

C-F) Semi-quantitative RT-PCR measuring intron retention in wild type and *bmc1Δ* strains grown at 32°C and 42°C for *rpl1603* intron 1 (RPG) (C), *pud1* intron 1 (D), *bor1* intron 2 (E), and *alp41* intron 3 (F) (nRPGs) (mean  $\pm$  standard error, two-tailed unpaired *t* test, \* $p < 0.05$ , \*\* $p < 0.01$ ) ( $n = 3$  biological replicates).



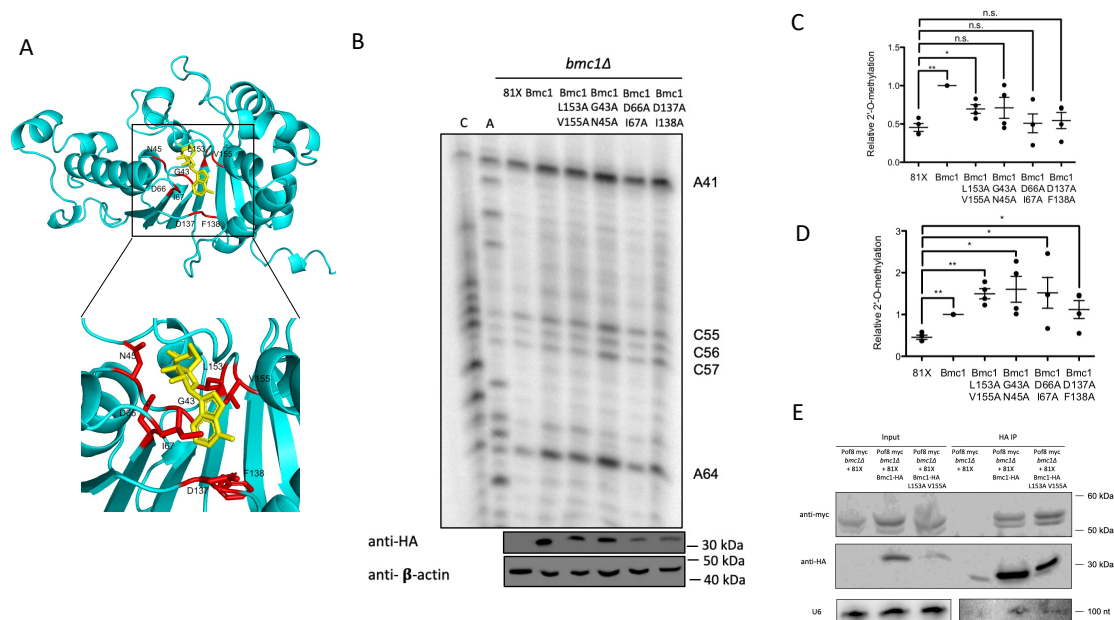

**Figure 4: BMC1 catalytic activity is not a requirement for 2'-O-methylation of U6**

A) AlphaFold (70) structure prediction of BMC1 aligned to the SAH-bound (yellow) catalytic domain of MePCE (PDB 6DCB) (64) with mutations indicated in red. Inset: side chain interactions with SAH.

B) U6 2'-O-methylation primer extension in *bmc1Δ* cells transformed with the indicated plasmid. 2'-O-methylated sites are indicated. Western blots for BMC1-HA expression and b-actin are indicated below.

C) Quantification of relative 2'-O-methylation-induced reverse transcriptase stops at A64, compared to wild type BMC1-HA (mean ± standard error, two-tailed unpaired *t* test, \**p* < 0.05, \*\**p* < 0.01) (*n* = 4 biological replicates).

D) Quantification of relative 2'-O-methylation-induced reverse transcriptase stops at A64, compared to wild type BMC1-HA, normalized to average BMC1-HA expression relative to b-actin (mean ± standard error, two-tailed unpaired *t* test, \**p* < 0.05, \*\**p* < 0.01) (*n* = 4 biological replicates).

E) Western blot and northern blot analysis of co-immunoprecipitation of HA-tagged BMC1, myc-tagged Pof8 and U6.



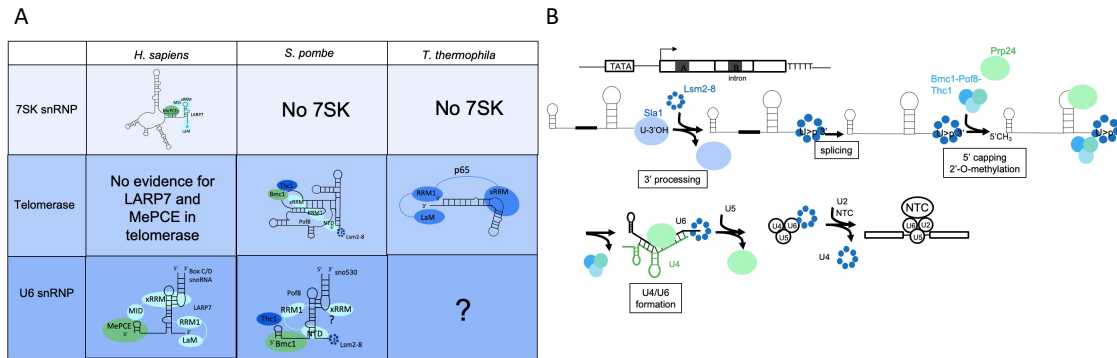

**Figure 6: Evolutionary convergence and divergence of Bmc1/MePCE and Pof8/LARP7 in noncoding RNA processing**

A) Summary of Bmc1/MePCE and Pof8/LARP7/p55 functions in the 7SK snRNP, telomerase holoenzyme, and U6 snRNP. LaM= La motif, RRM1= RNA Recognition Motif 1, xRRM= extended RNA Recognition Motif, NTD= N-terminal domain (Lsm2-8-interacting region), MID= MePCE-Interacting Domain. The existence and composition of a U6 snRNP in *T. thermophila* is currently unknown.

B) Schematic of the U6 biogenesis pathway in fission yeast. NTC= NineTeen Complex.
