# Supplementary material for: The fission yeast methyl phosphate capping enzyme Bmc1 guides 2’-O-methylation of the U6 snRNA
Source: bioRxiv or medRxiv preprint supplement (doi:10.1101/2023.01.27.525755), 2023-04-11
Supplement: Supplementary file [file media-1.pdf]

## Supporting Information for

The fission yeast methylphosphate capping enzyme Bmc1/Bin3 promotes 2'-O-methylation of U6 and pre-mRNA splicing

Jennifer Porat<sup>1</sup>, Viktor A. Slat<sup>2</sup>, Stephen D. Rader<sup>2</sup>, Mark A. Bayfield<sup>1\*</sup>

1. Department of Biology, York University, Toronto, Canada

2. Department of Chemistry and Biochemistry, University of Northern British Columbia, Prince George, Canada

\*Mark A. Bayfield

Email: [bayfield@yorku.ca](mailto:bayfield@yorku.ca)

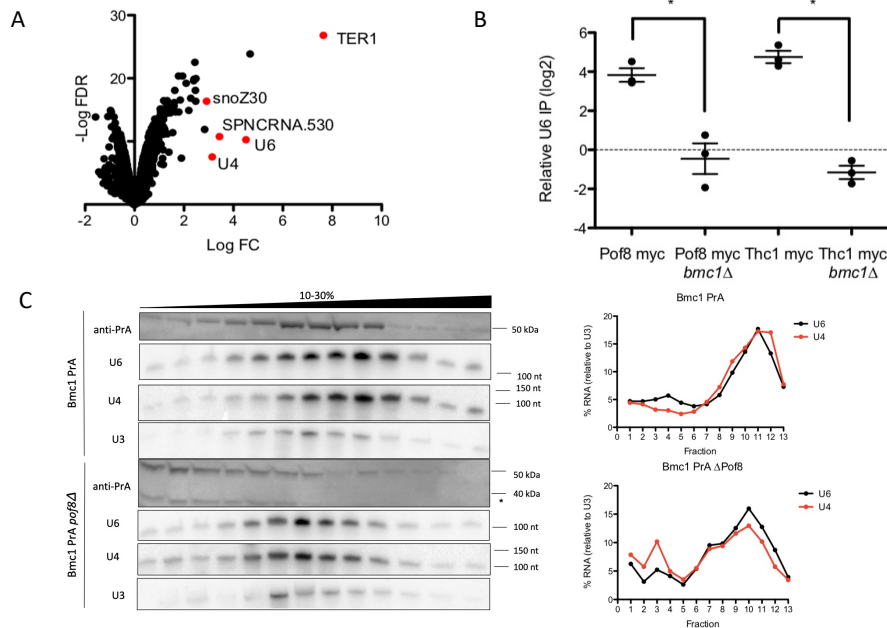

**Figure S1: Bmc1, Pof8, and Thc1 cooperate to bind U6 and U6-associated noncoding RNAs**

A) Enrichment of Bmc1 PrA-associated transcripts compared to an untagged control (n= 3 biological replicates). Axes represent log<sub>2</sub> of fold change (FC) and negative log of false discovery rate (FD) (Benjamini-Hochberg adjusted *P* value ≤0.05). Data taken from (1).

B) qRT-PCR of U6 in Pof8 myc and Thc1 myc immunoprecipitates, normalized to immunoprecipitation from an untagged strain (mean± standard error, two-tailed unpaired *t* test, \**p*<0.05) (n= 3 biological replicates).

C) Glycerol gradient sedimentation of PrA-tagged Bmc1, U4, U6, and U3 from wild type (Bmc1 PrA) and *pof8*Δ strains. Cleavage products are indicated with an asterisk. U4 and U6 signals were normalized to U3 for calculating relative migration in the gradient.

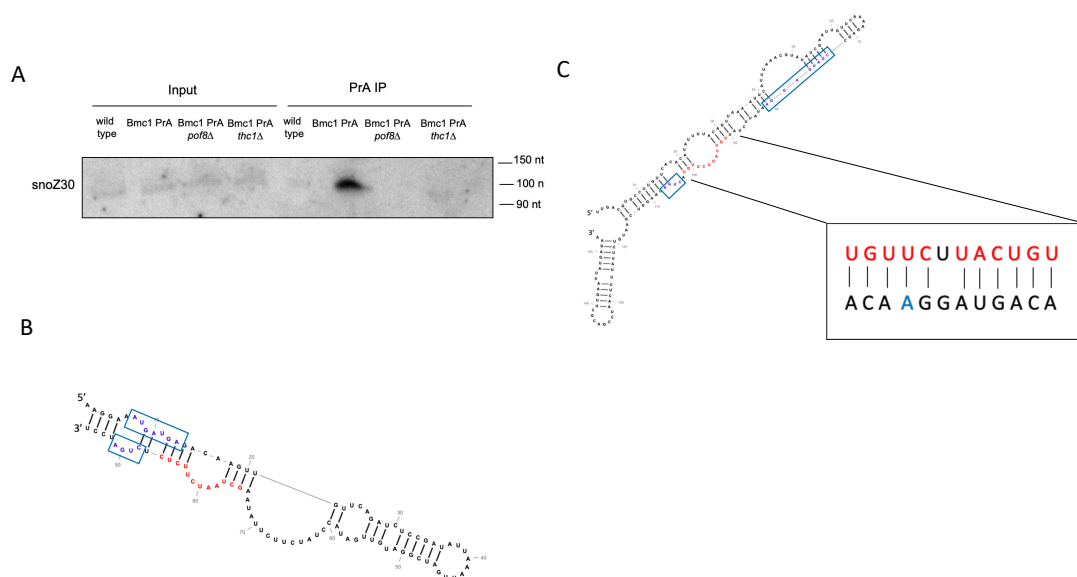

**Figure S2: snoZ30 and sno530 are Bmc1-interacting, U6-modifying snoRNAs**

A) Northern blot analysis of snoZ30 in total RNA and PrA immunoprecipitates from an untagged strain (wild type) and wild type and knockout PrA-tagged strains.

B) Secondary structure prediction (2) of snoZ30. C and D boxes are indicated in blue and U6-binding site is indicated in red.

C) Secondary structure prediction (2) of sno530. C and D boxes are indicated in blue and U6-binding site is indicated in red. Inset: U6-interacting region, highlighting Watson Crick and non-Watson Crick base pairs with U6 (black). A64 is indicated in blue.

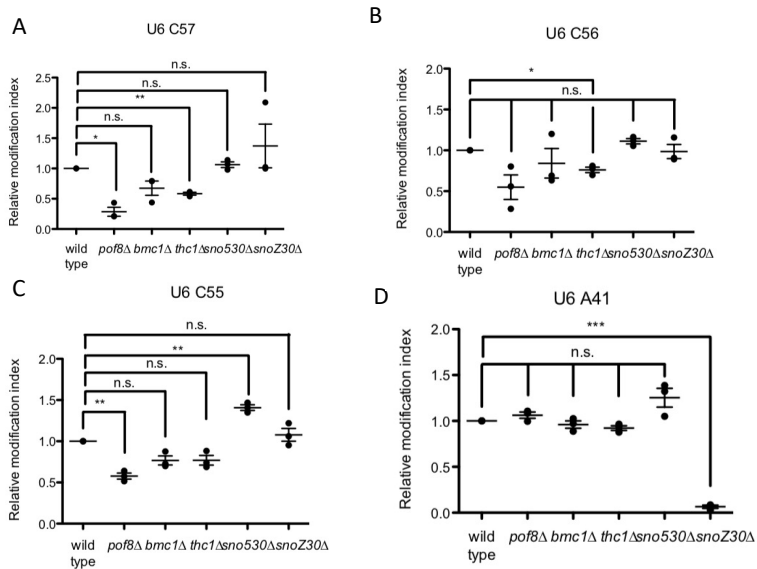

**Figure S3: Bmc1, Pof8, and Thc1 influence 2'-O-methylation of U6**  
 Quantification of relative 2'-O-methylation-induced reverse transcriptase stops, compared to a wild type strain, for C57 (A), C56 (B), C55 (C), and A41 (D) (mean  $\pm$  standard error, two-tailed unpaired *t* test, \* $p < 0.05$ , \*\* $p < 0.01$ , \*\*\* $p < 0.001$ ) ( $n = 3$  biological replicates).

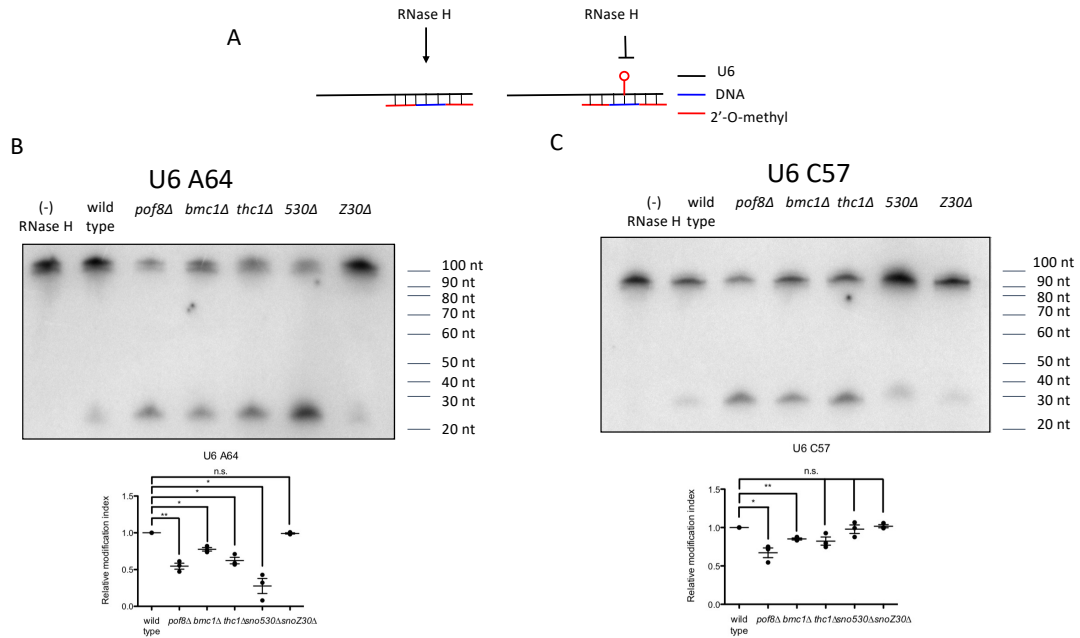

**Figure S4: RNase H cleavage validates 2'-O-methylation of U6 at A64 and C57**

A) Schematic of RNase H cleavage assay to detect 2'-O-methylations (3, 4).

B-C) Northern blot analysis and quantification of 2'-O-methylation at A64 (B) and C57 (C).

Relative modification is expressed as a fraction of the cleaved band relative to total U6 (mean  $\pm$  standard error, two-tailed unpaired *t* test, \* $p < 0.05$ , \*\* $p < 0.01$ ) ( $n = 3$  biological replicates).

**Table S1: Primer sequences for the creation of tagged and knockout *S. pombe* strains**

| Primer                    | Sequence                                                                  |
|---------------------------|---------------------------------------------------------------------------|
| 5' Thc1 myc Sall For      | 5' GCGCGTCGACATATTCATTGAAGTTGTAGTTTTAGCTTATTTGGTACCA<br>AAAG 3'           |
| 5' Thc1 myc BamHI Rev     | 5' GCGCGGATCCGACCTGAAGTCAAGAAATTTTGTAGTGGAATAATTCTT<br>TTC 3'             |
| 3' Thc1 myc SacI For      | 5'GCGCGAGCTCACAGATAAATTAGAACACAGCTTAAACTTACCGGAAAA<br>ATTAATC 3'          |
| 3' Thc1 myc SacII Rev     | 5' GCGCCCGCGGTTAGATAGCCATGAATAAATAATATCAAGAATATAATC<br>ATCTAAGC 3'        |
| 5' Prp24 myc XhoI For     | 5' CGCGCTCGAGCCTTAGCTAAAAGCTTTGAGACTACTGAGTCAAATAAA<br>ATG 3'             |
| 5' Prp24 myc BamHI<br>Rev | 5' GCGCGGATCCGTTTTAAAAACATTTTCCTAAAATCATCGTTGCTTTTAG<br>GTGCATC 3'        |
| 3' Prp24 myc SacI Rev     | 5' GCGCGAGCTCTCAGCAATAATTAGATTGAATGATTAAAAAAATATTGAA<br>AACC 3'           |
| 3' Prp24 myc SacII Rev    | 5'<br>CGCGCCGCGGTGAATATCATTAAAACCTTCATTTACTCTTGATGAAA<br>AAATTCAAGAGTC 3' |
| 5' Thc1 KO Sall For       | 5' GCGCGTCGACATAATAACTTTGCTTACGATTAATAGACAAATGAATGC<br>TG 3'              |
| 5' Thc1 KO BglII Rev      | 5' GCGCAGATCTTCTTCAAAACTTTTTGGTACCAAATAAGCTAAAAC TACA<br>A 3'             |
| 3' Thc1 KO ClaI For       | 5' GCGCATCGATACAGATAAATTAGAACACAGCTTAAACTTACCGGAAAA<br>A 3'               |
| 3' Thc1 KO SacII Rev      | 5' GCGCCCGCGGCTTTACTTAAACAGAGAAAAAAAACATCTGGAGA<br>C 3'                   |
| 5' sno530 KO Sall For     | 5' GCGCGTCGACGCATGTAAACTGTTTCACGACTTAACGGATCATATG<br>G 3'                 |
| 5' sno530 KO BglII Rev    | 5' GCGCAGATCTATTGACAACAATCAACTGCGTGTTTTATTTACTTTTAAG<br>A 3'              |
| 3' sno530 KO ClaI For     | 5' GCGCATCGATTCATACAAAAAACTGAGGCTATTTGCTTTAACTGTAGC<br>T 3'               |
| 3' sno530 KO SacII Rev    | 5' GCGCCCGCGGTGAACCTCAAGTCCCGCAAATACTTCCAATAATAATT<br>TG 3'               |
| 5' snoZ30 KO BamHI<br>For | 5' GCGCGGATCCATTTCTTTGCATCCTTTAATACTTTCCAATTCATTAA<br>G 3'                |
| 5' snoZ30 KO AscI Rev     | 5' GGCGCGCGCGCCCTCCTGGTCGACTTTATGGAATAAAGGGTTACAA<br>TTG 3'               |
| 3' snoZ30 KO SacI For     | 5' GCGCGAGCTCATCAAAGTAACTTTCTCGGAGAAAGGTGAGCAATTG<br>TAAT 3'              |
| 3' snoZ30 KO ClaI Rev     | 5' GCGCATCGATACAAATAAATACGATTAGTCTTAAGTTAATTTAGCACAA<br>AGATTTAAAGTC 3'   |

**Table S2: List of yeast strains used in this study**

| Figure                                  | Strain   | Description            | Full genotype                                                                      | Source                                     |
|-----------------------------------------|----------|------------------------|------------------------------------------------------------------------------------|--------------------------------------------|
| 1a, 1c, 2, 3, S1a, S1b, S2a, S3, S4, S5 | y12088   | wild type              | <i>h+ ura4-D18 leu1-32</i>                                                         | Lab stock                                  |
| 1, 2c, S1a, S2a                         | yJP001   | <i>bmc1-PrA</i>        | <i>h- ura4-D18 bmc1<sup>+</sup>::bmc1-PrA-kanMX6</i>                               | Porat et al., 2022                         |
| 1a, 1b, S2a                             | yJP011   | <i>bmc1-PrA pof8Δ</i>  | <i>h- leu1-32 ura4-D18 his3-D1 bmc1<sup>+</sup>::bmc1-PrA-kanMX6 pof8Δ::natMX6</i> | Porat et al., 2022                         |
| 1a, S2a                                 | yJP027   | <i>bmc1-PrA thc1Δ</i>  | <i>his3-D1 bmc1<sup>+</sup>::bmc1-PrA-kanMX6 thc1Δ::bleMX6</i>                     | This study                                 |
| 1c, 2a, 2d, 5, S3, S4                   | TN12118a | <i>pof8Δ</i>           | <i>h- leu1-32 ura4-D18 his3-D1 pof8Δ::natMX6</i>                                   | Mennie et al., 2018 and Porat et al., 2022 |
| 1c, 2a, 2d, 3, 4, S3, S4                | yJP022   | <i>bmc1Δ</i>           | <i>h+ ura4-D18 leu1-32 bmc1Δ::bleMX6</i>                                           | Porat et al., 2022                         |
| 1c, 2a, 2d, S3, S4                      | yJP026   | <i>thc1Δ</i>           | <i>h+ ura4-D18 thc1Δ::bleMX6</i>                                                   | This study                                 |
| 1c, 2a, 2d, S3, S4                      | yJP030   | <i>sno530Δ</i>         | <i>h+ ura4-D18 sno530Δ::bleMX6</i>                                                 | This study                                 |
| 1c, S3, S4                              | yJP031   | <i>snoZ30Δ</i>         | <i>h- ura4-D18 snoZ30Δ::bleMX6</i>                                                 | This study                                 |
| S2b, S2c                                | AM16932  | <i>pof8-myc</i>        | <i>h- leu1-32 ura4-D18 his3-D1 pof8<sup>+</sup>::13myc-kanMX6</i>                  | Mennie et al., 2018                        |
| S2b, S2c                                | yJP023   | <i>pof8-myc bmc1Δ</i>  | <i>leu1-32 ura4-D18 his3-D1 pof8<sup>+</sup>::13myc-kanMX6 bmc1Δ::bleMX6</i>       | Porat et al., 2022                         |
| S2b, S2c                                | yJP029   | <i>thc1-myc</i>        | <i>h- leu1-32 ura4-D18 his3-D1 thc1<sup>+</sup>::13myc-kanMX6</i>                  | This study                                 |
| S2b, S2c                                | yJP046   | <i>thc1-myc bmc1Δ</i>  | <i>leu1-32 ura4-D18 his3-D1 thc1<sup>+</sup>::13myc-kanMX6 bmc1Δ::bleMX6</i>       | This study                                 |
| 2g                                      | yJP048   | <i>prp24-myc</i>       | <i>h- leu1-32 ura4-D18 his3-D1 prp24<sup>+</sup>::13myc-kanMX6</i>                 | This study                                 |
| 2g                                      | yJP049   | <i>prp24-myc pof8Δ</i> | <i>leu1-32 ura4-D18 his3-D1 prp24<sup>+</sup>::13myc-kanMX6 pof8Δ::natMX6</i>      | This study                                 |
| 2g                                      | yJP050   | <i>prp24-myc bmc1Δ</i> | <i>leu1-32 ura4-D18 his3-D1 prp24<sup>+</sup>::13myc-kanMX6 bmc1Δ::bleMX6</i>      | This study                                 |

**Table S3: List of primer and RNA sequences used in this study**

| <b>Figure</b>                                                   | <b>Probe</b>                                                   | <b>Sequence</b>                                    |
|-----------------------------------------------------------------|----------------------------------------------------------------|----------------------------------------------------|
| 1a, S1b                                                         | U6 RT-PCR For                                                  | 5' CGGATCACTTTGGTCAAATTG 3'                        |
|                                                                 | U6 RT-PCR Rev                                                  | 5' CTCTCAATGTCGCAGTGTCATC 3'                       |
| 1a                                                              | 530 RT-PCR For                                                 | 5' ATGAGGAATATTCTATTGTCATTC 3'                     |
|                                                                 | 530 RT-PCR Rev                                                 | 5' AACCAATTCGATATACGTTTAAATG 3'                    |
| 1b, 1c,<br>2a, 2c,<br>2d, 2g,<br>4b, 4e,<br>5b, 5d,<br>S2c, S2d | U6 northern,<br>primer extension,<br>solution<br>hybridization | 5' AATGGGTTTTCTCTCAATGTCGCAG 3'                    |
| 1b, 2a,<br>2d, 2g                                               | U4 northern and<br>solution<br>hybridization                   | 5' GTTGGAGCGGTCAGGGTAATAGT 3'                      |
| S2a                                                             | snoZ30 northern                                                | 5' GGAGATCTGAACAACTTGTCTCATC 3'                    |
| 2a                                                              | U1 northern                                                    | 5' GCTGCAGAACTCATGCCAGGTAAGT 3'                    |
| 2a                                                              | U2 northern                                                    | 5' TGCCAGTAGTGCAATAGCAAGAACAC 3'                   |
| 2a                                                              | U3 northern                                                    | 5' ACACGTCAGAAAACACCAGCTGCC 3'                     |
| 2a                                                              | U5 northern                                                    | 5' GATTACAAAACTATACAGTCAAATTAGCAC 3'               |
| 2f                                                              | Unmodified U6<br>oligo                                         | 5' rUrGrGrCrCrCrCrUrGrCrArCrArArGrGrArUrGrArCrA 3' |
| 2f                                                              | A64m U6 oligo                                                  | 5' rUrGrGrCrCrCrCrUrGrCrArCrAmArGrGrArUrGrArCrA 3' |
| 2f                                                              | U4 oligo                                                       | 5' rArUrCrUrUrUrGrUrGrCrArCrGrGrUrArU 3'           |
| S4b                                                             | U6 A64 RNase H<br>chimeric oligo                               | 5' mUmCCTTGmUmGmCmAmGmGmGmCmCmAmU 3'               |
| S4c                                                             | U6 C57 RNase H<br>chimeric oligo                               | 5' mGmCAGGGmGmCmCmAmUmGmCmUmAmAmUmC 3'             |



**Dataset S1 (separate file).** Intron retention (IR) ratio values for wild type (y12088) and  $\Delta$ Bmc1 RNA Seq analysis at 32°C and 42 °C.

### SI References

1. J. Porat, M. El Baidouri, J. Grigull, J.-M. Deragon, M. A. Bayfield, The methyl phosphate capping enzyme Bmc1/Bin3 is a stable component of the fission yeast telomerase holoenzyme. *Nat. Commun.* **13**, 1277 (2022).
2. A. R. Gruber, R. Lorenz, S. H. Bernhart, R. Neuböck, I. L. Hofacker, The Vienna RNA Websuite. *Nucleic Acids Res.* **36**, W70–W74 (2008).
3. Y. T. Yu, M. Di Shu, J. A. Steitz, A new method for detecting sites of 2'-O-methylation in RNA molecules. *RNA* **3**, 324–331 (1997).
4. E. Calo, *et al.*, RNA helicase DDX21 coordinates transcription and ribosomal RNA processing. *Nature* **518**, 249–253 (2015).
